# Instructions for Obtaining ANESTHESIOLOGY Continuing Medical Education (CME) Credit

CME Editors: Leslie C. Jameson, M.D., Richard P. Dutton, M.D., M.B.A., and Dan J. Kopacz, M.D.

ANESTHESIOLOGY's Journal CME is open to all readers. Members of the American Society of Anesthesiologists (ASA) enjoy a preferred rate for their subscription. However, Journal CME is not limited to ASA members or Journal subscribers. To take part in Journal CME, complete the following steps:

1. For the article listed on the right, read the learning objectives and disclosure information.
2. Read the article in the print or online edition.
3. Register at [www.asahq.org/journal-cme](http://www.asahq.org/journal-cme) and provide payment.
4. Once online, complete the questions and other required information for the CME program, including the evaluation.

The American Society of Anesthesiologists is accredited by the Accreditation Council for Continuing Medical Education to provide continuing medical education for physicians.

The American Society of Anesthesiologists designates this educational activity for a maximum of 1 *AMA PRA Category 1 Credit(s)*<sup>TM</sup>. Physicians should only claim credit commensurate with the extent of their participation in the activity.

**Purpose:** The focus of ANESTHESIOLOGY Journal CME is to educate readers on current developments in the science and clinical practice of anesthesiology.

**Target Audience:** ANESTHESIOLOGY Journal CME is designed for physicians involved with anesthesiology education, clinical practice, and research.

## Journal CME Planning Participants Disclosures

**Editor-in-Chief:** James C. Eisenach, M.D., has no relevant financial relationships to disclose.

**CME Editors:** Leslie C. Jameson, M.D., Richard P. Dutton, M.D., M.B.A., and Dan J. Kopacz, M.D., have no relevant financial relationships to disclose.

**ASA Staff:** Employees involved in planning have no relevant financial relationships to disclose.

## Claiming Credit

All tests and requests for credit must be submitted through the ANESTHESIOLOGY CME website at [www.asahq.org/journal-cme](http://www.asahq.org/journal-cme). Participants should claim credit in 15-minute increments, for a

maximum of 1 *AMA PRA Category 1 Credit(s)*<sup>TM</sup> per journal article.

Two payment options are available:

|            | ASA Member | Non-member |
|------------|------------|------------|
| Annual Fee | \$60       | \$120      |
| Per Issue  | \$10       | \$20       |

Payment may be made using Visa or MasterCard.

Please direct any questions about Journal CME to:

Joyce Canselor  
Education Coordinator, CME  
(847) 268-9185  
[j.canselor@asahq.org](mailto:j.canselor@asahq.org)

## This Month's ANESTHESIOLOGY Journal CME

Read the article by Flu *et al.* entitled "Prognostic implications of asymptomatic left ventricular dysfunction in patients undergoing vascular surgery" on page 1316 of this issue.

## Learning Objective(s)

After completing this activity, the learner should be able to define the risks of left ventricular (LV) systolic dysfunction and isolated LV diastolic dysfunction in preoperative vascular surgery patients, understand the differences in perioperative risk between symptomatic and asymptomatic patients with LV dysfunction, and differentiate between which patients are at increased risk for cardiovascular complications when having open vascular surgery *versus* endovascular surgery.

## Author(s) Disclosures

**Authors:** Willem-Jan Flu, M.D., Jan-Peter van Kuijk, M.D., Sanne E. Hoeks, Ph.D., Ruud Kuiper, M.D., Olaf Schouten, M.D., Dustin Goei, M.D., Abdou Elhendy, M.D., Hence J. M. Verhagen, M.D., Ian R. Thomson, M.D., Jeroen J. Bax, M.D., Lee A. Fleisher, M.D., and Don Poldermans, M.D., returned disclosure forms indicating that they have no financial interest in or affiliation with any commercial supporter or providers of any commercial services discussed in this educational material.

## Expiration

Registration and submission of answers must be completed by June 30, 2013.
